# Supplementary material
Source: publisher site journal article supplement (https://www.dovepress.com/article/452919)
Supplement: Supplementary file 1 [file get_supplementary_file.php]

## Supplementary file 1: Define medical leadership in your own words'

“

The ability to handle the responsibilities at any point and lead your team during critical periods

”

“

Guiding a medical team to create treatment plans that instill confidence in patients regarding their quality and effectiveness.

”

“

Involves accepting and assigning tasks equitably, communicating effectively with colleagues and superiors, welcoming feedback and suggestions, and standing firm when necessary.

”

“

Managing tasks like patient care and investigations efficiently, while also having the chance to mentor and guide junior colleagues.

”

“

The ability to carry him/herself and make decisions and guide the team towards the best management while also taking in everyone's input and pointing out any shortcoming whilst also giving the solution or giving them that as a task to better improve them.

”

“

Is to efficiently manage tasks to achieve quick progress, creating effective plans, and motivating team members to work together with passion and dedication

”

“

Medical leadership involves the skill to collaborate with fellow doctors to enhance and advance the healthcare system.

”

“

The ability to lead a group of people to achieving a specific task or tasks, whilst applying good communication skills, professionalism and avoiding conflicts.

”

“

Medical leadership is about effectively guiding the healthcare team through clear communication and making smart decisions.

”

“

The fundamental concept that being a capable doctor naturally involves having the qualities of a proficient leader in the medical field.

”

“

Medical leadership means guiding both yourself and your colleagues to perform at their best potential.

”

“

Medical leadership is when a healthcare professional can inspire and motivate others.

”

“

Expressing remarkable strength by making determined decisions and staying committed

”

“

The ability to make difficult decisions during difficult times

”

“

To organize tasks, roles and responsibilities, and to adapt with the limitations.

”

“

Medical leadership is about solving problems well and making sure the whole team is happy with the results.

”

“

Taking charge and being accountable by proactively addressing situations, assuming responsibility, and showing initiative as a physician.

”

“

The confidence of making decisions and taking responsibilities in the medical field

”
